# Supplementary material for: Safety evaluation of repeated intravenous infusion of sinoporphyrin with and without PDT in rats
Source: Royal Society of Chemistry journal article supplement (doi:10.1039/c6pp00276e), 2016-09-09
Supplement: c6pp00276e4.pdf [file c6pp00276e4.pdf]

Supplementary

Table 4. Nucleated differential counts of born marrow aspirate in control and photosnesitizer high dose groups( $\bar{X} \pm S$ , n=10)

| NDC                         | Group I(control) |          | Group IV(18mg/kg) |           | Group VI(18mg/kg+ 60J) |           |
|-----------------------------|------------------|----------|-------------------|-----------|------------------------|-----------|
|                             | ♀                | ♂        | ♀                 | ♂         | ♀                      | ♂         |
| myeloblast                  | 0.0±0.0          | 0.0±0.0  | 0.0±0.0           | 0.0±0.0   | 0.0±0.0                | 0.0±0.0   |
| promyelocyte                | 1.8±1.5          | 3.1±0.7  | 1.8±0.9           | 2.1±1.2   | 1.7±1.1                | 2.4±1.3   |
| myelocyte                   | 11.6±2.9         | 12.7±1.9 | 10.1±1.7          | 14.2±1.3  | 12.3±1.8               | 13.2±2.5  |
| metamyelocyte               | 20.8±1.8         | 22.7±2.8 | 23.1±2.7          | 23.4±1.5  | 23.7±2.1*              | 21.9±2.2  |
| Polymorphonuclear leucocyte | 27.9±2.4         | 27.3±1.9 | 24.9±2.3*         | 24.7±0.9* | 24.7±3.5*              | 27.9±3.2  |
| Stab cel                    | 23.7±2.7         | 24.8±1.3 | 21.8±2.7          | 24.7±2.0  | 23.5±2.3               | 23.4±2.7  |
| eosinophil                  | 0.2±0.4          | 0.1±0.3  | 0.6±0.7           | 0.0±0.0   | 0.3±0.7                | 0.0±0.0   |
| basophil                    | 0.0±0.0          | 0.0±0.0  | 0.0±0.0           | 0.0±0.0   | 0.0±0.0                | 0.0±0.0   |
| proerythroblast             | 0.0±0.0          | 0.0±0.0  | 0.0±0.0           | 0.0±0.0   | 0.0±0.0                | 0.0±0.0   |
| Basophilic erythroblast     | 5.1±1.5          | 5.0±1.7  | 4.7±1.2           | 3.0±1.2*  | 5.2±2.3                | 4.1±1.4   |
| Polychromatic erythroblast  | 27.1±1.4         | 26.1±1.8 | 27.2±2.0          | 28.1±1.8* | 27.7±2.9               | 28.2±1.6* |
| Orthochromatic erythroblast | 30.3±2.5         | 29.9±2.2 | 33.1±2.5          | 30.0±1.6  | 30.4±3.8               | 29.5±1.9  |
| lymphoblast                 | 0.0±0.0          | 0.0±0.0  | 0.0±0.0           | 0.0±0.0   | 0.0±0.0                | 0.0±0.0   |
| prolymphocyte               | 0.0±0.0          | 0.0±0.0  | 0.0±0.0           | 0.0±0.0   | 0.0±0.0                | 0.0±0.0   |
| lymphocyte                  | 51.2±3.0         | 47.8±3.0 | 51.6±2.0          | 49.8±2.3  | 49.7±3.4               | 49.2±2.4  |
| monoblast                   | 0.0±0.0          | 0.0±0.0  | 0.0±0.0           | 0.0±0.0   | 0.0±0.0                | 0.0±0.0   |
| promonocyte                 | 0.0±0.0          | 0.0±0.0  | 0.0±0.0           | 0.0±0.0   | 0.0±0.0                | 0.0±0.0   |
| monocyte                    | 0.0±0.0          | 0.0±0.0  | 0.0±0.0           | 0.0±0.0   | 0.0±0.0                | 0.0±0.0   |
| plasmablast                 | 0.0±0.0          | 0.0±0.0  | 0.0±0.0           | 0.0±0.0   | 0.0±0.0                | 0.0±0.0   |
| Proplasmacyte               | 0.0±0.0          | 0.0±0.0  | 0.0±0.0           | 0.0±0.0   | 0.0±0.0                | 0.0±0.0   |
| Plasmacyte                  | 0.3±0.5          | 0.5±0.7  | 1.1±0.7           | 0.1±0.3   | 0.8±0.9                | 0.2±0.4   |
| Tissue eosinophil           | 0.0±0.0          | 0.0±0.0  | 0.0±0.0           | 0.0±0.0   | 0.0±0.0                | 0.0±0.0   |
| Tissue basophil             | 0.0±0.0          | 0.0±0.0  | 0.0±0.0           | 0.0±0.0   | 0.0±0.0                | 0.0±0.0   |
| megakaryocyte               | 13.7±1.6         | 17.5±2.0 | 15.3±2.4          | 20.2±3.2  | 16.3±2.8               | 17.9±2.6  |
| M:E                         | 1.4±0.1          | 1.5±0.1  | 1.3±0.1           | 1.5±0.1   | 1.4±0.2                | 1.4±0.1   |

Note: 200 nucleated cells were counted in bone marrow aspirate

Compared with control groups of same sex, \*P<0.05, \*\*P<0.01
